# Supplementary material for: Effects of Physical and Chemical States of Iron-Based Catalysts on Formation of Carbon-Encapsulated Iron Nanoparticles from Kraft Lignin
Source: PubMed Central journal article supplement (PMC5793637; doi:10.3390/ma11010139), 2018-01-15
Supplement: materials-11-00139-s001.pdf [file materials-11-00139-s001.pdf]

# Effects of Physical and Chemical States of Iron-Based Catalysts on Formation of Carbon-Encapsulated Iron Nanoparticles from Kraft Lignin

Xuefeng Zhang <sup>1</sup>, Qiangu Yan <sup>1,\*</sup>, Jinghao Li <sup>2</sup>, Jilei Zhang <sup>1,\*</sup> and Zhiyong Cai <sup>2,\*</sup>

<sup>1</sup> Department of Sustainable Bioproducts, Mississippi State University, Mississippi State, MS 39762, USA

<sup>2</sup> U.S. Department of Agriculture, Forest Service, Forest Products Laboratory Madison, WI 53726, USA

## Supplementary Materials

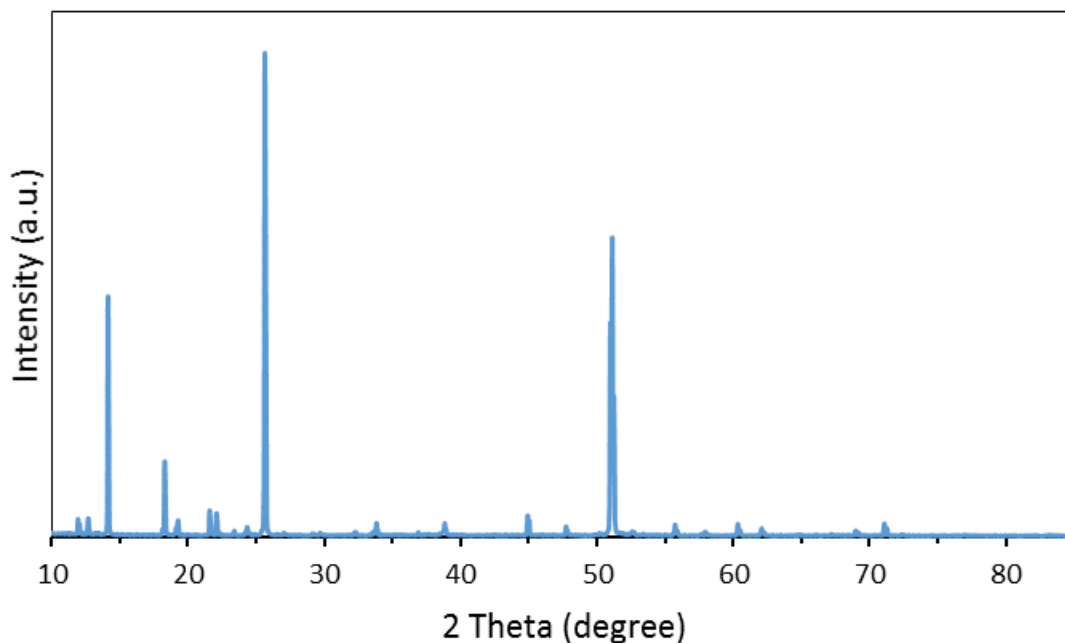

**Figure S1.** XRD pattern of FeN (Iron(III) nitrate nonahydrate,  $\text{Fe}(\text{NO}_3)_3 \cdot 9\text{H}_2\text{O}$ ).

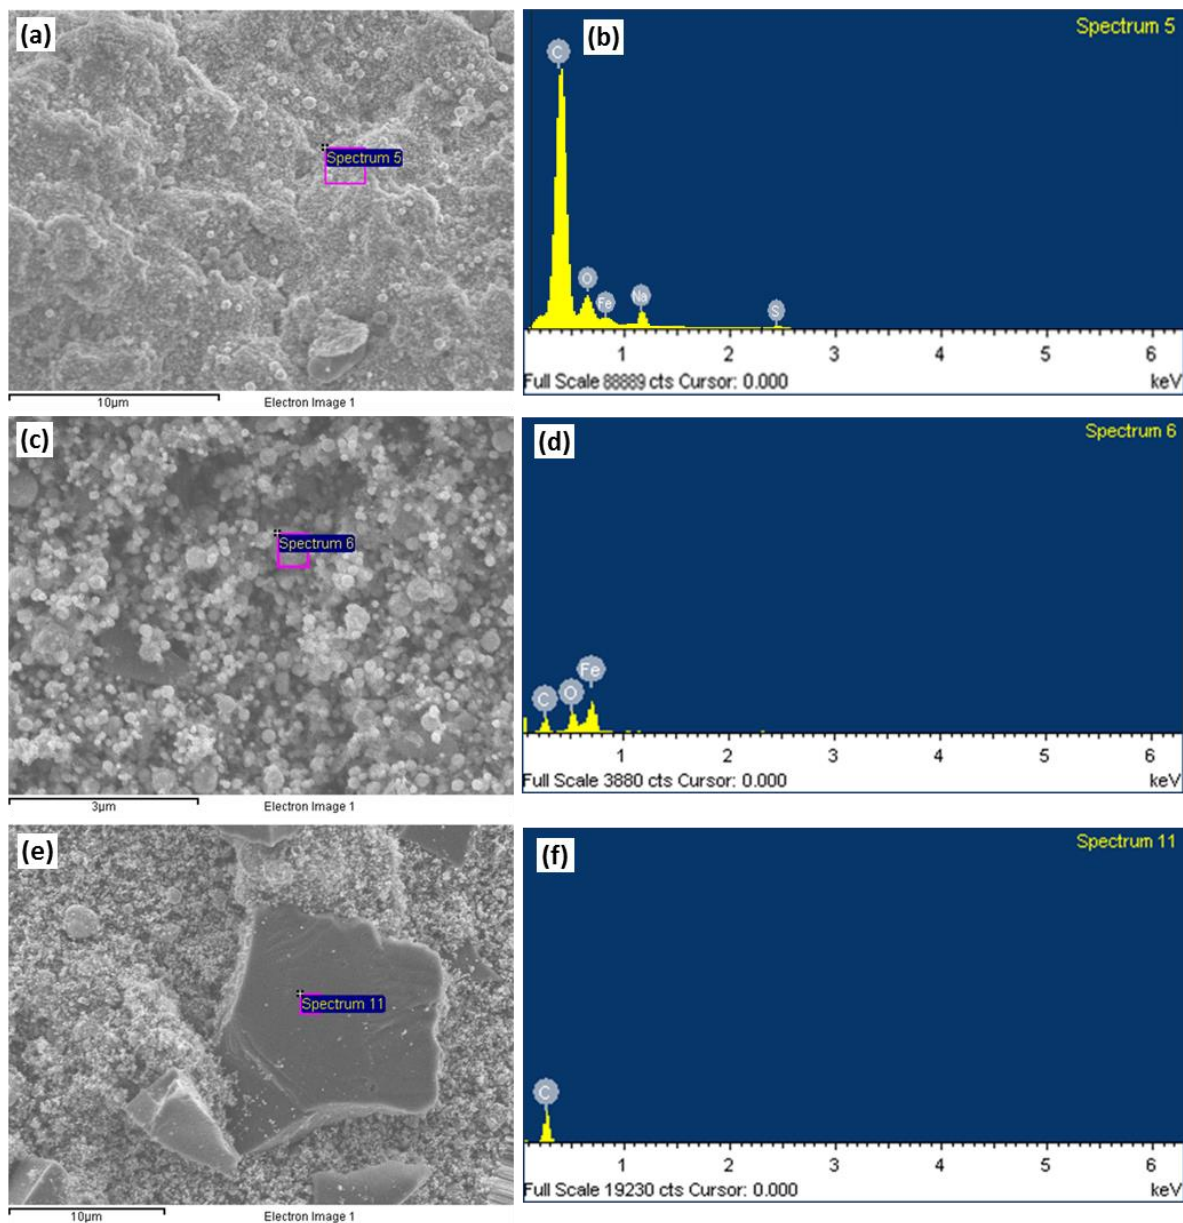

**Figure S2.** (a, c, and e) SEM images and (b, d, and f) the selected area SEM-EDS energy dispersive spectra of KL/FeN-1000 (a and b), surface nanoparticles of KL/FeP-1000 (c and d), and naked surface of KL/FeP-1000 (e and f).
